# Supplementary material
Source: publisher figshare collection journal article supplement (https://acs.figshare.com/ndownloader/files/3736057)
Supplement: Supplementary file 1 [file 3736057]

## Supporting Information

### Water Interactions in Zeolite Catalysts and Their Hydrophobically-Modified Analogues

Kuizhi Chen, Jarred Kelsey, Lu Zhang,<sup>‡</sup> Daniel Resasco,<sup>‡</sup> and Jeffery L. White\*

Department of Chemistry, Oklahoma State University, Stillwater, OK 74078

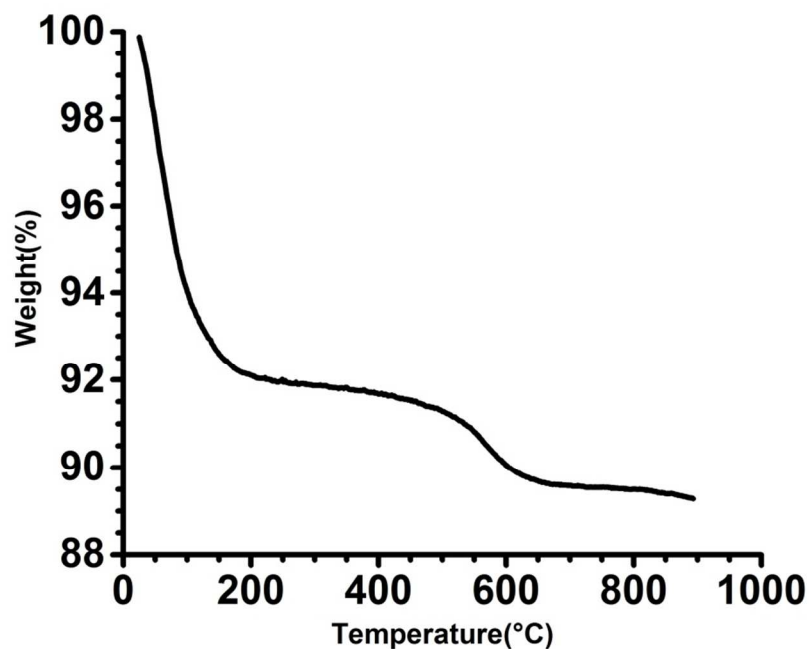

**Figure S1.** Thermal gravimetric analysis (TGA) curves for ETS-HZSM-5, with the experiment done in air. The 8% mass loss at 100-150 C is from water, and the ca. 3% mass loss near 500 C is from decomposition of the surface ETS groups.

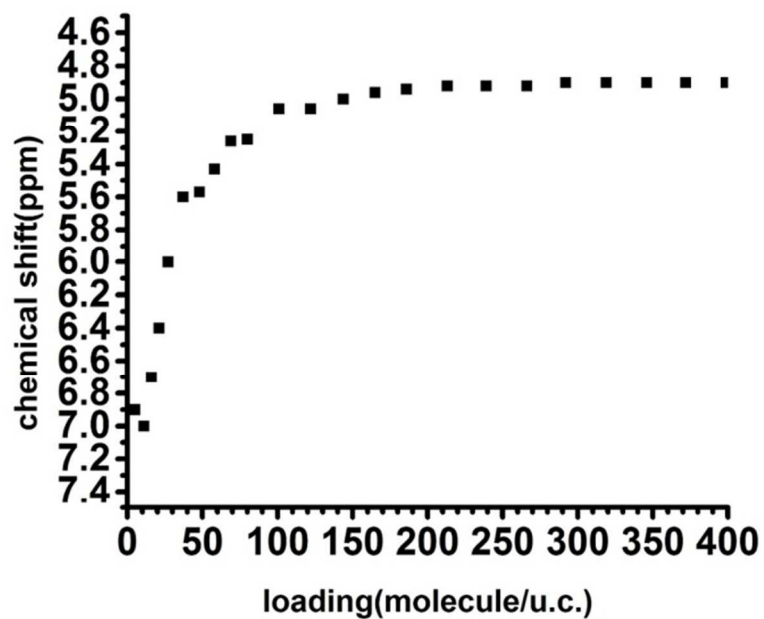

**Figure S2.** Complete water loading/chemical shift titration curve for water loaded in Si/Al = 15 H-ZSM-5 up to 400 water molecules per unit cell.

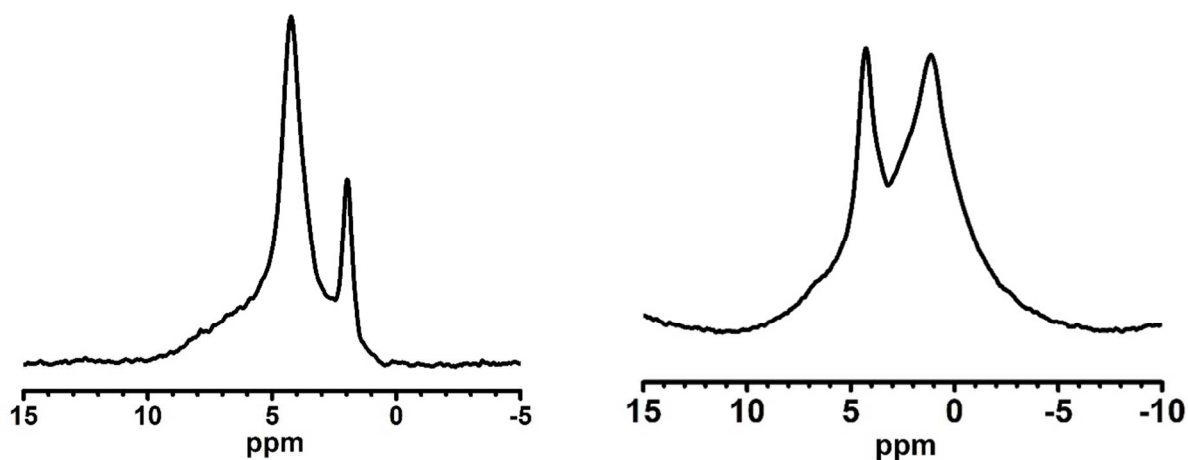

**Figure S3.** Representative  $^1\text{H}$  MAS NMR spectra for calcined and dehydrated (**left**) H-ZSM-5 and (**right**) ETS-H-ZSM-5.

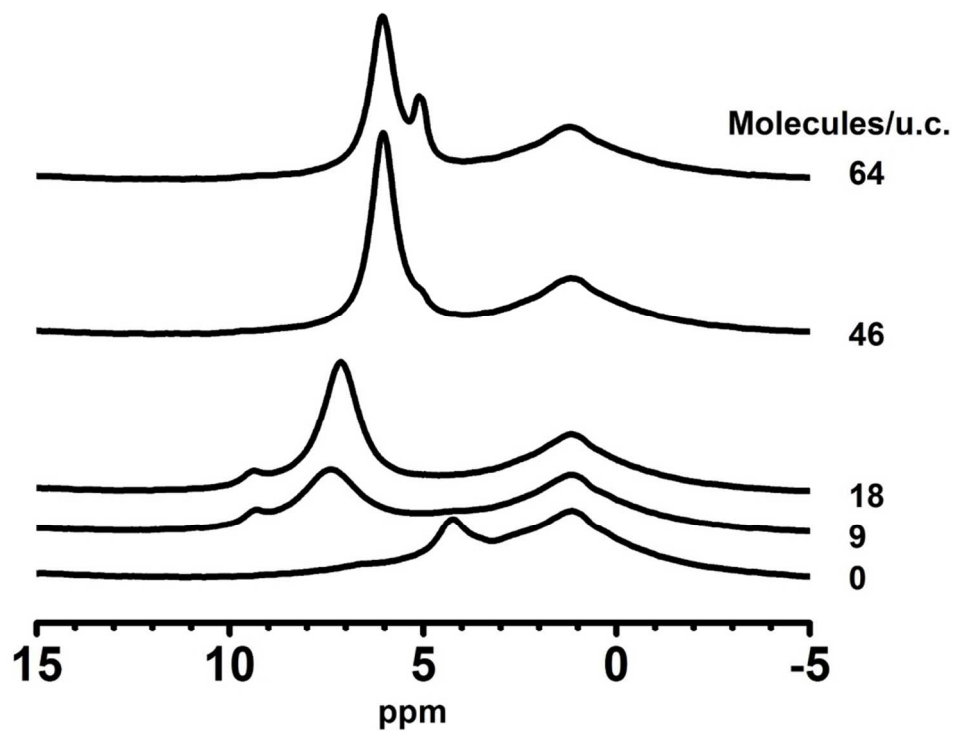

**Figure S4.**  $^1\text{H}$  MAS NMR spectra for  $\text{D}_2\text{O}$  in ETS-HZSM-5 as a function of its loading per zeolitic unit cell. Peak assignments are as in the text for Figures 8 and 9.
